# Supplementary material for: Reduced immune responsiveness contributes to winter energy conservation in an Arctic bird
Source: Oxford University Press journal article supplement (doi:10.1242/jeb.219287), 2020-04-15
Supplement: jeb219287supp.pdf [file jeb219287supp.pdf]

**Table S1.** Parameter estimates, likelihood ratios (LRT), and *P*-values (single term deletions) for models of the responses to an immune challenge (1 mg kg<sup>-1</sup> intramuscular LPS) in Svalbard ptarmigan that were studied in winter and spring in each of two ambient temperatures ( $T_a$ ; 0°C and -20°C). The Season  $\times$   $T_a$  interaction was removed from the models when non-significant, but all other terms were retained. Significances of main effects were not assessed in the presence of interactions. Different letters within brackets denote significant differences. Abbreviations: RMR: Resting metabolic rate; C: Thermal conductance;  $T_c$ : Core body temperature;  $T_{back}$ : Back skin temperature;  $T_{head}$ : Head skin temperature; BKA: Bacteria killing ability. *P*-values < 0.05 are printed in bold. \* *P* = 0.052.

| Parameter                                   | Estimate (SE)  | LRT   | <i>P</i>          |
|---------------------------------------------|----------------|-------|-------------------|
| <b>Change in RMR (W)</b>                    |                |       |                   |
| Season (Winter or Spring)                   |                | 11.13 | <b>&lt; 0.001</b> |
| Season = Winter [A]                         | -0.26 (0.14)   |       |                   |
| Season = Spring [B]                         | 0.50 (0.18)    |       |                   |
| $T_a$ (-20°C or 0°C)                        |                | 2.02  | 0.155             |
| Season $\times$ $T_a$                       |                | 0.15  | 0.693             |
| <b>Change in C (W °C<sup>-1</sup>)</b>      |                |       |                   |
| Season (Winter or Spring)                   |                | 10.38 | <b>0.001</b>      |
| Season = Winter [A]                         | -0.004 (0.003) |       |                   |
| Season = Spring [B]                         | 0.012 (0.004)  |       |                   |
| $T_a$ (-20°C or 0°C)                        |                | 1.31  | 0.252             |
| Season $\times$ $T_a$                       |                | 0.61  | 0.433             |
| <b>Change in <math>T_c</math> (°C)</b>      |                |       |                   |
| Season (Winter or Spring)                   |                | 2.23  | 0.136             |
| $T_a$ (-20°C or 0°C)                        |                | 0.41  | 0.520             |
| Season $\times$ $T_a$                       |                | 2.11  | 0.146             |
| <b>Change in <math>T_{back}</math> (°C)</b> |                |       |                   |
| Season (Winter or Spring)                   |                | 5.81  | <b>0.016</b>      |
| Season = Winter [A]                         | -0.92 (0.32)   |       |                   |
| Season = Spring [B]                         | -0.19 (0.27)   |       |                   |
| $T_a$ (-20°C or 0°C)                        |                | 0.06  | 0.805             |
| Season $\times$ $T_a$                       |                | 0.33  | 0.567             |
| <b>Change in <math>T_{head}</math> (°C)</b> |                |       |                   |
| Season (Winter or Spring)                   |                | 2.53  | 0.112             |
| $T_a$ (-20°C or 0°C)                        |                | 0.91  | 0.341             |
| Season $\times$ $T_a$                       |                | 0.10  | 0.751             |
| <b>Change in lysis (titer)</b>              |                |       |                   |
| Season (Winter or Spring)                   |                |       |                   |
| $T_a$ (-20°C or 0°C)                        |                |       |                   |
| Season $\times$ $T_a$                       |                | 10.39 | <b>0.001</b>      |
| Season = Winter                             |                |       |                   |
| $T_a$ = -20°C [A]                           | -1.30 (0.19)   |       |                   |
| $T_a$ = 0°C [B]                             | -0.55 (0.14)   |       |                   |
| Season = Spring                             |                |       |                   |
| $T_a$ = -20°C [B*]                          | -0.21 (0.22)   |       |                   |
| $T_a$ = 0°C [B]                             | -0.60 (0.17)   |       |                   |
| <b>Change in agglutination (titer)</b>      |                |       |                   |
| Season (Winter or Spring)                   |                | 0.36  | 0.547             |
| $T_a$ (-20°C or 0°C)                        |                | 5.07  | <b>0.024</b>      |
| $T_a$ = -20°C [A]                           | -1.67 (1.03)   |       |                   |
| $T_a$ = 0°C [B]                             | 1.03 (0.76)    |       |                   |
| Season $\times$ $T_a$                       |                | 0.95  | 0.330             |
| <b>Change in BKA (%)</b>                    |                |       |                   |
| Season (Winter or Spring)                   |                | 0.08  | 0.780             |
| $T_a$ (-20°C or 0°C)                        |                | 0.25  | 0.620             |
| Season $\times$ $T_a$                       |                | 1.43  | 0.232             |

|                                                            |             |       |                   |
|------------------------------------------------------------|-------------|-------|-------------------|
| <b>Change in haptoglobin (mg ml<sup>-1</sup>)</b>          |             |       |                   |
| Season (Winter or Spring)                                  |             | 0.12  | 0.733             |
| $T_a$ (-20°C or 0°C)                                       |             | 0.75  | 0.385             |
| Season $\times T_a$                                        |             | 0.03  | 0.857             |
| <b>Duration of anorexia (d)</b>                            |             |       |                   |
| Season (Winter or Spring)                                  |             | 0.01  | 0.937             |
| $T_a$ (0°C or -20°C)                                       |             | 0.34  | 0.562             |
| Season $\times T_a$                                        |             | 3.31  | 0.069             |
| <b>Magnitude of anorexia (<math>M_a</math>)</b>            |             |       |                   |
| Season (Winter or Spring)                                  |             | 1.20  | 0.274             |
| $T_a$ (0°C or -20°C)                                       |             | 5.11  | <b>0.024</b>      |
| $T_a = -20^\circ\text{C}$ [A]                              | 0.34 (0.06) |       |                   |
| $T_a = 0^\circ\text{C}$ [B]                                | 0.48 (0.05) |       |                   |
| Season $\times T_a$                                        |             | 0.77  | 0.380             |
| <b>Body mass loss (g)</b>                                  |             |       |                   |
| Season (Winter or Spring)                                  |             | 1.98  | 0.159             |
| $T_a$ (0°C or -20°C)                                       |             | 1.96  | 0.161             |
| Season $\times T_a$                                        |             | 1.75  | 0.186             |
| <b>Body mass loss (proportion of baseline)</b>             |             |       |                   |
| Season (Winter or Spring)                                  |             | 4.26  | <b>0.039</b>      |
| Season = Winter [A]                                        | 0.07 (0.02) |       |                   |
| Season = Spring [B]                                        | 0.12 (0.02) |       |                   |
| $T_a$ (0°C or -20°C)                                       |             | 1.40  | 0.237             |
| Season $\times T_a$                                        |             | 0.49  | 0.484             |
| <b>Loss of fasting resistance (d)</b>                      |             |       |                   |
| Season (Winter or Spring)                                  |             | 2.15  | 0.142             |
| $T_a$ (0°C or -20°C)                                       |             | 2.20  | 0.138             |
| Season $\times T_a$                                        |             | 1.69  | 0.194             |
| <b>Loss of fasting resistance (proportion of baseline)</b> |             |       |                   |
| Season (Winter or Spring)                                  |             | 13.25 | <b>&lt; 0.001</b> |
| Season = Winter [A]                                        | 0.17 (0.04) |       |                   |
| Season = Spring [B]                                        | 0.38 (0.05) |       |                   |
| $T_a$ (0°C or -20°C)                                       |             | 0.13  | 0.721             |
| Season $\times T_a$                                        |             | 1.82  | 0.178             |
